# Supplementary material for: Association of tyrosine kinase 2 polymorphisms with susceptibility to microscopic polyangiitis in a Guangxi population
Source: PeerJ. 2024 Dec 23;12:e18735. doi: 10.7717/peerj.18735 (PMC11670758; doi:10.7717/peerj.18735)
Supplement: Supplemental Information 1 [file peerj-12-18735-s001.xlsx]

## Sheet: Sheet1
ID	rs2304256	rs280519	rs2304255	rs12720270	gender	age	status	ethnicity
A1	C/A	A/G	C/C	G/A	Male	55	1-cese	ethnic non-Han
A2	C/C	A/G	C/T	G/G	FeMale	65	1-cese	ethnic non-Han
A3	A/A	G/G	C/C	A/A	FeMale	38	1-cese	ethnic Han
A4	C/C	A/A	C/C	G/G	Male	75	1-cese	ethnic Han
A5	C/C	A/A	C/C	G/G	Male	29	1-cese	ethnic non-Han
A6	C/C	A/A	C/C	G/G	FeMale	42	1-cese	ethnic Han
A7	C/A	A/G	C/C	G/A	FeMale	30	1-cese	ethnic Han
A8	A/A	G/G	C/C	A/A	Male	40	1-cese	ethnic non-Han
A9	C/A	A/G	C/C	G/A	Male	74	1-cese	ethnic Han
A10	A/A	G/G	C/C	G/A	Male	57	1-cese	ethnic non-Han
A11	C/A	A/G	C/C	G/A	Male	45	1-cese	ethnic Han
A12	C/C	A/A	C/C	G/G	FeMale	69	1-cese	ethnic Han
A13	A/A	G/G	C/C	A/A	Male	54	1-cese	ethnic Han
A14	C/A	A/A	C/C	G/A	FeMale	41	1-cese	ethnic Han
A15	C/A	A/G	C/C	G/A	Male	54	1-cese	ethnic Han
A16	A/A	G/G	C/C	A/A	FeMale	58	1-cese	ethnic non-Han
A17	C/A	A/G	C/C	G/A	FeMale	23	1-cese	ethnic non-Han
A18	C/A	A/G	C/C	G/A	FeMale	47	1-cese	ethnic Han
A19	A/A	G/G	C/C	A/A	FeMale	42	1-cese	ethnic non-Han
A20	C/A	A/G	C/C	G/A	Male	26	1-cese	ethnic non-Han
A21	A/A	G/G	C/C	A/A	Male	23	1-cese	ethnic Han
A22	C/A	A/G	C/C	G/A	FeMale	56	1-cese	ethnic Han
A23	A/A	G/G	C/C	G/A	Male	61	1-cese	ethnic non-Han
A24	C/C	A/A	C/C	G/G	FeMale	70	1-cese	ethnic non-Han
A25	A/A	G/G	C/C	A/A	FeMale	54	1-cese	ethnic Han
A26	C/C	A/G	C/T	G/G	FeMale	47	1-cese	ethnic Han
A27	C/A	G/G	C/C	G/G	FeMale	59	1-cese	ethnic Han
A28	C/C	A/G	C/T	G/G	Male	63	1-cese	ethnic Han
A29	A/A	G/G	C/C	A/A	Male	61	1-cese	ethnic Han
A30	A/A	G/G	C/C	A/A	Male	22	1-cese	ethnic non-Han
A31	C/A	A/G	C/C	G/A	FeMale	56	1-cese	ethnic non-Han
A32	C/A	A/G	C/C	G/A	Male	41	1-cese	ethnic Han
A33	C/A	A/G	C/C	G/G	Male	43	1-cese	ethnic non-Han
A34	C/A	A/G	C/C	G/A	FeMale	78	1-cese	ethnic non-Han
A35	A/A	G/G	C/C	A/A	FeMale	55	1-cese	ethnic Han
A36	C/A	G/G	C/T	G/A	Male	58	1-cese	ethnic Han
A37	A/A	G/G	C/C	G/G	Male	41	1-cese	ethnic Han
A38	C/C	A/A	C/C	G/G	Male	41	1-cese	ethnic Han
A39	A/A	G/G	C/C	A/A	Male	82	1-cese	ethnic Han
A40	C/C	A/A	C/C	G/G	FeMale	20	1-cese	ethnic Han
A41	A/A	G/G	C/C	G/G	Male	26	1-cese	ethnic Han
A42	C/C	A/A	C/C	G/G	Male	28	1-cese	ethnic Han
A43	C/C	A/A	C/C	G/G	FeMale	63	1-cese	ethnic non-Han
A44	A/A	G/G	C/C	A/A	FeMale	48	1-cese	ethnic Han
A45	C/A	A/G	C/C	G/A	FeMale	66	1-cese	ethnic non-Han
A46	C/A	A/G	C/C	G/A	Male	22	1-cese	ethnic Han
A47	C/A	A/G	C/C	G/A	FeMale	56	1-cese	ethnic Han
A48	A/A	G/G	C/C	G/A	FeMale	54	1-cese	ethnic Han
A49	C/A	A/G	C/C	G/G	FeMale	64	1-cese	ethnic non-Han
A50	C/A	A/G	C/C	G/A	FeMale	58	1-cese	ethnic Han
A51	A/A	G/G	C/C	A/A	FeMale	40	1-cese	ethnic Han
A52	C/C	A/A	C/C	G/G	Male	60	1-cese	ethnic Han
A53	C/C	A/A	C/C	G/G	FeMale	41	1-cese	ethnic Han
A54	C/A	A/G	C/C	G/A	FeMale	68	1-cese	ethnic Han
A55	A/A	G/G	C/C	G/A	Male	52	1-cese	ethnic non-Han
A56	C/A	A/G	C/C	G/A	FeMale	58	1-cese	ethnic non-Han
A57	A/A	G/G	C/C	A/A	Male	29	1-cese	ethnic non-Han
A58	C/A	A/G	C/C	G/A	FeMale	78	1-cese	ethnic non-Han
A59	C/C	A/A	C/C	G/G	FeMale	67	1-cese	ethnic non-Han
A60	C/C	A/G	C/T	G/G	FeMale	32	1-cese	ethnic non-Han
A61	A/A	G/G	C/C	A/A	Male	58	1-cese	ethnic Han
A62	C/A	A/G	C/C	G/A	FeMale	55	1-cese	ethnic Han
A63	C/C	A/A	C/C	G/G	FeMale	74	1-cese	ethnic Han
A64	C/A	A/G	C/C	G/A	FeMale	61	1-cese	ethnic non-Han
A65	C/A	A/G	C/C	G/A	FeMale	61	1-cese	ethnic Han
A66	A/A	G/G	C/C	A/A	FeMale	41	1-cese	ethnic non-Han
A67	A/A	G/G	C/C	A/A	Male	61	1-cese	ethnic Han
A68	C/A	A/G	C/C	G/A	Male	30	1-cese	ethnic non-Han
A69	C/A	G/G	C/T	G/A	FeMale	65	1-cese	ethnic Han
A70	C/A	G/G	C/T	G/A	FeMale	19	1-cese	ethnic Han
A71	C/C	A/A	C/C	G/G	Male	74	1-cese	ethnic Han
A72	A/A	G/G	C/C	A/A	FeMale	32	1-cese	ethnic Han
A73	C/A	A/G	C/C	G/A	Male	69	1-cese	ethnic Han
A74	A/A	G/G	C/C	A/A	FeMale	63	1-cese	ethnic non-Han
A75	A/A	G/G	C/C	A/A	Male	58	1-cese	ethnic non-Han
A76	C/A	A/G	C/C	G/A	FeMale	61	1-cese	ethnic non-Han
A77	A/A	G/G	C/C	A/A	FeMale	61	1-cese	ethnic Han
A78	A/A	G/G	C/C	A/A	Male	57	1-cese	ethnic Han
A79	A/A	G/G	C/C	A/A	FeMale	67	1-cese	ethnic non-Han
A80	C/A	A/G	C/C	G/A	Male	54	1-cese	ethnic Han
A81	C/C	A/A	C/C	G/G	FeMale	55	1-cese	ethnic Han
A82	C/A	A/G	C/C	G/A	FeMale	60	1-cese	ethnic Han
A83	C/A	A/G	C/C	G/A	Male	75	1-cese	ethnic Han
A84	C/A	G/G	C/C	G/A	FeMale	76	1-cese	ethnic Han
A85	C/A	A/G	C/C	G/A	FeMale	74	1-cese	ethnic Han
A86	A/A	G/G	C/C	A/A	FeMale	62	1-cese	ethnic Han
A87	C/A	G/G	C/C	G/A	FeMale	30	1-cese	ethnic non-Han
A88	C/A	A/G	C/C	G/A	FeMale	70	1-cese	ethnic Han
A89	A/A	G/G	C/C	A/A	FeMale	43	1-cese	ethnic Han
A90	C/A	A/G	C/C	G/A	FeMale	19	1-cese	ethnic Han
A91	C/A	A/G	C/C	G/G	FeMale	77	1-cese	ethnic non-Han
A92	A/A	G/G	C/C	A/A	FeMale	43	1-cese	ethnic Han
A93	C/A	A/G	C/C	G/A	FeMale	59	1-cese	ethnic Han
A94	C/A	A/G	C/C	G/A	FeMale	50	1-cese	ethnic non-Han
A95	A/A	G/G	C/C	A/A	FeMale	19	1-cese	ethnic non-Han
A96	A/A	G/G	C/C	A/A	Male	59	1-cese	ethnic Han
A97	C/A	A/G	C/C	G/A	FeMale	69	1-cese	ethnic Han
A98	A/A	G/G	C/C	A/A	Male	64	1-cese	ethnic non-Han
A99	C/A	A/G	C/C	G/A	FeMale	54	1-cese	ethnic Han
A100	A/A	G/G	C/C	A/A	Male	59	1-cese	ethnic Han
A101	A/A	G/G	C/C	A/A	FeMale	73	1-cese	ethnic Han
A102	C/A	A/G	C/C	G/A	FeMale	35	1-cese	ethnic non-Han
A103	C/A	A/G	C/C	G/A	FeMale	43	1-cese	ethnic non-Han
A104	A/A	G/G	C/C	A/A	FeMale	54	1-cese	ethnic Han
A105	C/A	A/G	C/C	G/A	FeMale	29	1-cese	ethnic Han
A106	C/A	G/G	C/T	G/A	Male	50	1-cese	ethnic Han
A107	A/A	G/G	C/C	A/A	FeMale	65	1-cese	ethnic non-Han
A108	C/A	A/G	C/C	G/A	FeMale	40	1-cese	ethnic Han
A109	A/A	G/G	C/C	A/A	Male	64	1-cese	ethnic Han
A110	A/A	G/G	C/C	A/A	FeMale	54	1-cese	ethnic Han
A111	A/A	G/G	C/C	A/A	FeMale	30	1-cese	ethnic Han
A112	C/A	A/G	C/C	G/A	Male	39	1-cese	ethnic non-Han
A113	C/C	A/A	C/C	G/G	FeMale	69	1-cese	ethnic Han
A114	A/A	G/G	C/C	A/A	FeMale	75	1-cese	ethnic non-Han
A115	A/A	G/G	C/C	A/A	FeMale	53	1-cese	ethnic Han
A116	C/A	G/G	C/C	G/A	FeMale	33	1-cese	ethnic Han
A117	C/C	A/G	C/C	G/G	Male	54	1-cese	ethnic non-Han
A118	C/A	A/G	C/C	G/A	FeMale	75	1-cese	ethnic Han
A119	A/A	G/G	C/C	A/A	Male	51	1-cese	ethnic Han
A120	A/A	G/G	C/C	A/A	FeMale	49	1-cese	ethnic Han
A121	A/A	G/G	C/C	A/A	Male	58	1-cese	ethnic non-Han
A122	C/A	G/G	C/C	G/G	FeMale	36	1-cese	ethnic non-Han
A123	A/A	G/G	C/C	G/A	Male	67	1-cese	ethnic Han
A124	A/A	G/G	C/C	A/A	FeMale	72	1-cese	ethnic Han
A125	C/A	A/G	C/C	G/A	FeMale	63	1-cese	ethnic Han
A126	C/A	G/G	C/T	G/A	Male	42	1-cese	ethnic non-Han
A127	C/A	A/G	C/C	G/A	FeMale	33	1-cese	ethnic Han
A128	C/A	A/G	C/C	G/A	FeMale	63	1-cese	ethnic Han
A129	A/A	G/G	C/C	A/A	Male	47	1-cese	ethnic non-Han
A130	C/A	A/G	C/C	G/A	FeMale	60	1-cese	ethnic non-Han
A131	C/A	G/G	C/C	G/A	Male	64	1-cese	ethnic non-Han
A132	C/A	A/G	C/C	G/A	Male	63	1-cese	ethnic non-Han
A133	C/A	A/G	C/C	G/A	Male	76	1-cese	ethnic non-Han
A134	A/A	G/G	C/C	G/A	FeMale	63	1-cese	ethnic Han
A135	C/A	G/G	C/C	G/A	FeMale	63	1-cese	ethnic Han
A136	A/A	G/G	C/C	A/A	FeMale	69	1-cese	ethnic Han
A137	C/C	A/G	C/C	G/G	FeMale	48	1-cese	ethnic non-Han
A138	C/A	G/G	C/T	G/A	FeMale	56	1-cese	ethnic Han
A139	C/A	A/G	C/C	G/A	Male	50	1-cese	ethnic Han
A140	A/A	G/G	C/C	A/A	FeMale	67	1-cese	ethnic Han
A141	C/C	A/A	C/C	G/G	Male	61	1-cese	ethnic Han
A142	C/A	A/G	C/C	G/A	Male	73	1-cese	ethnic Han
A143	A/A	G/G	C/C	A/A	Male	71	1-cese	ethnic non-Han
A144	A/A	G/G	C/C	A/A	FeMale	30	1-cese	ethnic non-Han
A145	C/A	A/G	C/C	G/G	FeMale	65	1-cese	ethnic non-Han
A146	C/A	A/G	C/C	G/A	Male	74	1-cese	ethnic Han
A147	C/A	A/G	C/C	G/A	FeMale	21	1-cese	ethnic non-Han
A148	C/A	A/G	C/C	G/A	FeMale	69	1-cese	ethnic non-Han
A149	C/A	A/G	C/C	G/A	FeMale	58	1-cese	ethnic Han
A150	A/A	G/G	C/C	G/A	FeMale	62	1-cese	ethnic non-Han
A151	A/A	G/G	C/C	A/A	Male	53	1-cese	ethnic non-Han
A152	C/A	A/G	C/C	G/A	Male	70	1-cese	ethnic Han
A153	C/A	A/G	C/C	G/A	Male	53	1-cese	ethnic non-Han
A154	C/A	G/G	C/C	G/A	FeMale	64	1-cese	ethnic Han
A155	C/A	A/G	C/C	G/A	Male	56	1-cese	ethnic non-Han
A156	A/A	G/G	C/C	A/A	FeMale	44	1-cese	ethnic non-Han
A157	A/A	G/G	C/C	A/A	FeMale	47	1-cese	ethnic Han
A158	A/A	G/G	C/C	A/A	FeMale	62	1-cese	ethnic Han
A159	C/A	A/G	C/C	G/A	FeMale	62	1-cese	ethnic Han
A160	A/A	G/G	C/C	G/A	FeMale	68	1-cese	ethnic Han
A161	C/C	A/A	C/C	G/G	Male	51	1-cese	ethnic Han
A162	C/C	A/A	C/C	G/G	FeMale	62	1-cese	ethnic Han
A163	A/A	G/G	C/C	G/A	FeMale	75	1-cese	ethnic Han
A164	A/A	G/G	C/C	A/A	Male	61	1-cese	ethnic Han
A165	C/C	A/A	C/C	G/G	FeMale	60	1-cese	ethnic Han
A166	C/C	A/A	C/C	G/G	FeMale	71	1-cese	ethnic non-Han
A167	C/A	A/G	C/C	G/A	Male	60	1-cese	ethnic Han
A168	C/A	A/G	C/C	G/A	FeMale	62	1-cese	ethnic Han
A169	C/C	A/A	C/C	G/G	FeMale	55	1-cese	ethnic non-Han
A170	C/A	G/G	C/T	G/A	Male	67	1-cese	ethnic Han
A171	A/A	G/G	C/C	A/A	FeMale	48	1-cese	ethnic non-Han
A172	C/A	A/G	C/C	G/A	Male	59	1-cese	ethnic Han
A173	A/A	G/G	C/C	A/A	Male	40	1-cese	ethnic non-Han
A174	C/A	A/G	C/C	G/A	FeMale	61	1-cese	ethnic Han
A175	A/A	G/G	C/C	A/A	Male	66	1-cese	ethnic Han
A176	C/A	A/G	C/C	G/A	FeMale	45	1-cese	ethnic Han
A177	C/A	G/G	C/T	G/A	Male	47	1-cese	ethnic Han
A178	C/A	A/G	C/C	G/A	FeMale	46	1-cese	ethnic Han
A179	C/A	A/G	C/C	G/A	Male	63	1-cese	ethnic Han
A180	A/A	G/G	C/C	A/A	Male	48	1-cese	ethnic non-Han
A181	C/A	A/G	C/C	G/A	FeMale	59	1-cese	ethnic Han
A182	C/A	A/G	C/C	G/A	FeMale	52	1-cese	ethnic non-Han
A183	C/A	A/G	C/C	G/A	FeMale	56	1-cese	ethnic non-Han
A184	A/A	G/G	C/C	A/A	FeMale	56	1-cese	ethnic non-Han
A185	C/A	A/G	C/C	G/A	FeMale	59	1-cese	ethnic Han
A186	A/A	G/G	C/C	A/A	FeMale	53	1-cese	ethnic Han
A187	C/C	A/A	C/C	G/G	Male	64	1-cese	ethnic Han
A188	C/A	A/G	C/C	G/A	FeMale	67	1-cese	ethnic non-Han
A189	C/A	A/G	C/C	G/A	Male	65	1-cese	ethnic Han
A190	C/A	A/G	C/C	G/A	FeMale	68	1-cese	ethnic Han
A191	A/A	G/G	C/C	A/A	FeMale	66	1-cese	ethnic non-Han
A192	C/C	A/A	C/C	G/G	Male	72	1-cese	ethnic Han
A193	A/A	G/G	C/C	A/A	Male	72	1-cese	ethnic Han
A194	C/A	A/G	C/C	G/A	Male	64	1-cese	ethnic Han
A195	C/A	A/G	C/C	G/A	FeMale	19	1-cese	ethnic Han
A196	C/A	A/G	C/C	G/A	FeMale	51	1-cese	ethnic Han
A197	A/A	G/G	C/C	A/A	Male	66	1-cese	ethnic Han
A198	C/A	A/G	C/C	G/A	FeMale	65	1-cese	ethnic Han
A199	C/C	A/A	C/C	G/G	FeMale	18	1-cese	ethnic non-Han
A200	C/A	G/G	C/C	G/A	FeMale	51	1-cese	ethnic Han
A201	A/A	G/G	C/C	A/A	Male	65	1-cese	ethnic Han
A202	A/A	G/G	C/C	A/A	FeMale	66	1-cese	ethnic non-Han
A203	C/A	A/G	C/C	G/A	FeMale	74	1-cese	ethnic non-Han
A204	C/A	A/G	C/C	G/A	FeMale	53	1-cese	ethnic non-Han
A205	A/A	G/G	C/C	A/A	FeMale	69	1-cese	ethnic non-Han
A206	A/A	G/G	C/C	A/A	FeMale	41	1-cese	ethnic non-Han
A207	C/C	A/A	C/C	G/G	FeMale	58	1-cese	ethnic Han
A208	C/A	A/G	C/C	G/A	Male	43	1-cese	ethnic non-Han
A209	A/A	G/G	C/C	A/A	FeMale	63	1-cese	ethnic Han
A210	A/A	G/G	C/C	A/A	FeMale	62	1-cese	ethnic non-Han
A211	A/A	G/G	C/C	A/A	Male	51	1-cese	ethnic non-Han
A212	A/A	G/G	C/C	A/A	FeMale	67	1-cese	ethnic Han
A213	C/C	A/A	C/C	G/G	FeMale	53	1-cese	ethnic Han
A214	C/A	A/G	C/C	G/A	FeMale	74	1-cese	ethnic non-Han
A215	A/A	G/G	C/C	G/A	FeMale	73	1-cese	ethnic non-Han
A216	C/C	A/G	C/C	G/G	Male	56	1-cese	ethnic Han
A217	C/A	A/G	C/C	G/A	FeMale	69	1-cese	ethnic non-Han
A218	C/A	A/G	C/C	G/A	FeMale	68	1-cese	ethnic Han
A219	A/A	G/G	C/C	A/A	Male	76	1-cese	ethnic Han
A220	C/A	A/G	C/C	G/A	FeMale	58	1-cese	ethnic non-Han
A221	A/A	G/G	C/C	A/A	Male	58	1-cese	ethnic Han
A222	A/A	G/G	C/C	A/A	FeMale	72	1-cese	ethnic Han
A223	C/A	A/G	C/C	G/G	FeMale	77	1-cese	ethnic non-Han
A224	C/A	G/G	C/T	G/A	FeMale	54	1-cese	ethnic non-Han
A225	C/A	G/G	C/C	G/A	FeMale	31	1-cese	ethnic Han
A226	C/A	G/G	C/C	G/A	FeMale	69	1-cese	ethnic non-Han
A227	C/A	A/G	C/C	G/A	FeMale	77	1-cese	ethnic Han
A228	C/C	A/G	C/T	G/G	Male	75	1-cese	ethnic Han
A229	A/A	G/G	C/C	A/A	Male	82	1-cese	ethnic non-Han
A230	C/A	A/G	C/C	G/A	FeMale	84	1-cese	ethnic Han
A231	A/A	G/G	C/C	A/A	FeMale	23	1-cese	ethnic Han
A232	C/A	A/G	C/C	G/A	FeMale	77	1-cese	ethnic non-Han
A233	C/C	A/G	C/T	G/G	FeMale	76	1-cese	ethnic Han
A234	C/A	A/G	C/C	G/A	Male	48	1-cese	ethnic Han
A235	C/A	A/G	C/C	G/A	FeMale	58	1-cese	ethnic non-Han
A236	C/A	A/G	C/C	G/A	FeMale	66	1-cese	ethnic non-Han
A237	C/A	A/G	C/C	G/A	FeMale	58	1-cese	ethnic non-Han
A238	A/A	G/G	C/C	A/A	Male	47	1-cese	ethnic Han
A239	A/A	G/G	C/C	A/A	FeMale	66	1-cese	ethnic Han
A240	C/A	G/G	C/C	G/A	FeMale	86	1-cese	ethnic non-Han
A241	A/A	G/G	C/C	A/A	Male	57	1-cese	ethnic Han
A242	C/A	A/G	C/C	G/A	FeMale	65	1-cese	ethnic Han
A243	C/A	A/G	C/C	G/A	FeMale	39	1-cese	ethnic non-Han
A244	C/A	A/G	C/C	G/A	Male	60	1-cese	ethnic non-Han
A245	A/A	G/G	C/C	A/A	FeMale	34	1-cese	ethnic non-Han
A246	A/A	G/G	C/C	A/A	FeMale	36	1-cese	ethnic non-Han
A247	C/C	A/A	C/C	G/G	Male	61	1-cese	ethnic non-Han
A248	C/A	A/G	C/C	G/A	Male	67	1-cese	ethnic Han
A249	C/A	A/G	C/C	G/A	Male	55	1-cese	ethnic Han
A250	C/A	A/G	C/C	G/A	FeMale	63	1-cese	ethnic Han
A251	A/A	G/G	C/C	A/A	Male	66	1-cese	ethnic Han
A252	C/A	A/G	C/C	G/A	FeMale	36	1-cese	ethnic non-Han
A253	A/A	G/G	C/C	A/A	FeMale	25	1-cese	ethnic non-Han
A254	C/A	A/G	C/C	G/A	Male	65	1-cese	ethnic Han
A255	A/A	G/G	C/C	A/A	FeMale	75	1-cese	ethnic Han
A256	C/A	A/G	C/C	G/A	FeMale	39	1-cese	ethnic Han
A257	A/A	G/G	C/C	A/A	Male	82	1-cese	ethnic Han
A258	C/A	A/G	C/C	G/A	FeMale	80	1-cese	ethnic Han
A259	A/A	G/G	C/C	A/A	Male	66	1-cese	ethnic Han
A260	C/A	A/G	C/C	G/A	FeMale	77	1-cese	ethnic non-Han
A261	C/A	A/G	C/C	G/A	FeMale	81	1-cese	ethnic Han
A262	A/A	G/G	C/C	A/A	Male	60	1-cese	ethnic Han
A263	C/A	A/G	C/C	G/A	FeMale	63	1-cese	ethnic non-Han
A264	A/A	G/G	C/C	A/A	FeMale	72	1-cese	ethnic Han
A265	C/A	A/G	C/C	G/A	FeMale	68	1-cese	ethnic Han
A266	C/A	A/G	C/C	G/A	Male	70	0-control	ethnic Han
A267	A/A	G/G	C/C	A/A	Male	81	0-control	ethnic Han
A268	A/A	G/G	C/C	G/A	FeMale	48	0-control	ethnic Han
A269	C/A	A/G	C/C	G/A	FeMale	60	0-control	ethnic Han
A270	C/A	A/G	C/C	G/A	FeMale	68	0-control	ethnic Han
A271	A/A	G/G	C/C	A/A	FeMale	61	0-control	ethnic Han
A272	C/A	A/G	C/C	G/A	FeMale	54	0-control	ethnic Han
A273	C/A	A/G	C/C	G/A	Male	56	0-control	ethnic Han
A274	A/A	G/G	C/C	A/A	FeMale	77	0-control	ethnic Han
A275	C/A	A/G	C/C	G/A	Male	73	0-control	ethnic Han
A276	A/A	G/G	C/C	G/A	FeMale	81	0-control	ethnic Han
A277	A/A	G/G	C/C	A/A	Male	63	0-control	ethnic Han
A278	C/C	A/G	C/T	G/G	FeMale	50	0-control	ethnic non-Han
A279	C/A	A/G	C/C	G/A	FeMale	33	0-control	ethnic Han
A280	A/A	G/G	C/C	A/A	FeMale	19	0-control	ethnic Han
A281	C/A	A/G	C/C	G/A	Male	54	0-control	ethnic Han
A282	C/A	A/G	C/C	G/A	FeMale	54	0-control	ethnic non-Han
A283	C/C	A/G	C/C	G/G	FeMale	35	0-control	ethnic non-Han
A284	C/A	A/G	C/C	G/A	FeMale	55	0-control	ethnic Han
A285	C/C	A/G	C/T	G/G	FeMale	80	0-control	ethnic non-Han
A286	C/A	A/G	C/C	G/A	FeMale	72	0-control	ethnic Han
A287	C/A	A/G	C/C	G/A	Male	77	0-control	ethnic Han
A288	A/A	G/G	C/C	A/A	FeMale	70	0-control	ethnic Han
A289	A/A	G/G	C/C	A/A	FeMale	35	0-control	ethnic Han
A290	C/A	A/G	C/C	G/A	Male	25	0-control	ethnic Han
A291	C/A	A/G	C/C	G/A	FeMale	38	0-control	ethnic Han
A292	A/A	G/G	C/C	A/A	Male	69	0-control	ethnic Han
A293	C/A	A/G	C/C	G/A	FeMale	42	0-control	ethnic non-Han
A294	C/A	A/G	C/C	G/A	Male	51	0-control	ethnic non-Han
A295	A/A	G/G	C/C	A/A	FeMale	74	0-control	ethnic Han
A296	C/A	A/G	C/C	G/A	FeMale	44	0-control	ethnic non-Han
A297	C/A	A/G	C/C	G/A	FeMale	51	0-control	ethnic non-Han
A298	C/C	A/A	C/C	G/G	FeMale	56	0-control	ethnic non-Han
A299	C/A	A/G	C/C	G/A	FeMale	42	0-control	ethnic Han
A300	C/A	A/G	C/C	G/G	FeMale	63	0-control	ethnic Han
A301	C/C	A/A	C/C	G/G	FeMale	31	0-control	ethnic Han
A302	A/A	G/G	C/C	A/A	FeMale	56	0-control	ethnic Han
A303	A/A	G/G	C/C	G/A	FeMale	47	0-control	ethnic Han
A304	C/A	A/G	C/C	G/A	Male	57	0-control	ethnic Han
A305	A/A	G/G	C/C	A/A	Male	47	0-control	ethnic Han
A306	A/A	G/G	C/C	A/A	Male	68	0-control	ethnic Han
A307	A/A	G/G	C/C	A/A	FeMale	38	0-control	ethnic Han
A308	C/A	A/G	C/C	G/A	Male	45	0-control	ethnic Han
A309	A/A	G/G	C/C	A/A	Male	64	0-control	ethnic Han
A310	A/A	G/G	C/C	A/A	Male	61	0-control	ethnic Han
A311	A/A	G/G	C/C	A/A	Male	26	0-control	ethnic non-Han
A312	C/A	G/G	C/T	G/A	Male	68	0-control	ethnic Han
A313	C/A	A/G	C/C	G/A	Male	47	0-control	ethnic Han
A314	A/A	G/G	C/C	A/A	FeMale	47	0-control	ethnic Han
A315	C/A	A/G	C/C	G/A	Male	60	0-control	ethnic Han
A316	C/A	A/G	C/C	G/A	FeMale	30	0-control	ethnic Han
A317	C/A	A/G	C/C	G/A	FeMale	54	0-control	ethnic Han
A318	C/A	A/G	C/C	G/A	Male	35	0-control	ethnic non-Han
A319	C/A	A/G	C/C	G/A	Male	79	0-control	ethnic Han
A320	A/A	G/G	C/C	A/A	Male	52	0-control	ethnic Han
A321	C/A	A/G	C/C	G/A	FeMale	70	0-control	ethnic Han
A322	C/A	A/G	C/C	G/A	Male	60	0-control	ethnic Han
A323	C/C	A/A	C/C	G/G	Male	39	0-control	ethnic Han
A324	A/A	G/G	C/C	G/A	FeMale	61	0-control	ethnic non-Han
A325	A/A	G/G	C/C	A/A	FeMale	49	0-control	ethnic non-Han
A326	C/A	A/G	C/C	G/A	FeMale	45	0-control	ethnic Han
A327	C/A	A/G	C/C	G/G	Male	46	0-control	ethnic Han
A328	A/A	G/G	C/C	A/A	FeMale	39	0-control	ethnic Han
A329	C/A	A/G	C/C	G/A	Male	50	0-control	ethnic non-Han
A330	C/A	A/G	C/C	G/A	FeMale	48	0-control	ethnic Han
A331	A/A	G/G	C/C	A/A	Male	18	0-control	ethnic non-Han
A332	C/A	G/G	C/C	G/A	FeMale	35	0-control	ethnic Han
A333	A/A	G/G	C/C	A/A	Male	56	0-control	ethnic non-Han
A334	C/A	A/G	C/C	G/A	Male	81	0-control	ethnic Han
A335	A/A	G/G	C/C	A/A	FeMale	34	0-control	ethnic Han
A336	A/A	G/G	C/C	A/A	FeMale	55	0-control	ethnic Han
A337	A/A	G/G	C/C	A/A	FeMale	45	0-control	ethnic Han
A338	C/A	A/G	C/C	G/A	Male	33	0-control	ethnic Han
A339	C/A	A/G	C/C	G/A	FeMale	39	0-control	ethnic Han
A340	C/C	A/G	C/T	G/G	FeMale	36	0-control	ethnic non-Han
A341	C/C	A/A	C/C	G/G	Male	40	0-control	ethnic Han
A342	A/A	G/G	C/C	A/A	Male	27	0-control	ethnic Han
A343	C/A	A/G	C/C	G/A	Male	52	0-control	ethnic non-Han
A344	A/A	G/G	C/C	A/A	FeMale	21	0-control	ethnic non-Han
A345	C/A	A/G	C/C	G/A	Male	19	0-control	ethnic non-Han
A346	C/A	A/G	C/C	G/A	FeMale	40	0-control	ethnic non-Han
A347	C/C	A/G	C/C	G/G	Male	35	0-control	ethnic Han
A348	C/A	A/G	C/C	G/A	Male	70	0-control	ethnic Han
A349	A/A	G/G	C/C	A/A	FeMale	18	0-control	ethnic Han
A350	A/A	G/G	C/C	G/A	FeMale	46	0-control	ethnic non-Han
A351	C/A	A/G	C/C	G/A	FeMale	66	0-control	ethnic Han
A352	C/C	A/A	C/C	G/G	FeMale	81	0-control	ethnic Han
A353	C/C	A/A	C/C	G/G	FeMale	52	0-control	ethnic Han
A354	C/A	A/G	C/C	G/A	FeMale	65	0-control	ethnic non-Han
A355	C/A	G/G	C/C	G/A	FeMale	41	0-control	ethnic Han
A356	C/A	G/G	C/T	G/A	FeMale	70	0-control	ethnic Han
A357	C/C	A/A	C/C	G/G	FeMale	71	0-control	ethnic Han
A358	C/A	G/G	C/C	G/A	FeMale	52	0-control	ethnic Han
A359	A/A	G/G	C/C	A/A	FeMale	44	0-control	ethnic Han
A360	A/A	G/G	C/C	A/A	FeMale	76	0-control	ethnic Han
A361	C/A	G/G	C/T	G/A	FeMale	47	0-control	ethnic Han
A362	C/A	G/G	C/T	G/A	Male	59	0-control	ethnic Han
A363	A/A	G/G	C/C	A/A	FeMale	40	0-control	ethnic Han
A364	C/A	A/G	C/C	G/A	Male	51	0-control	ethnic Han
A365	A/A	G/G	C/C	A/A	FeMale	64	0-control	ethnic Han
A366	A/A	G/G	C/C	A/A	FeMale	37	0-control	ethnic non-Han
A367	C/A	A/G	C/C	G/A	Male	65	0-control	ethnic Han
A368	C/A	A/G	C/C	G/A	FeMale	38	0-control	ethnic Han
A369	C/C	A/G	C/C	G/G	FeMale	45	0-control	ethnic Han
A370	C/C	A/A	C/C	G/G	FeMale	51	0-control	ethnic non-Han
A371	C/A	A/G	C/C	G/A	FeMale	43	0-control	ethnic non-Han
A372	C/A	A/G	C/C	G/A	FeMale	58	0-control	ethnic Han
A373	A/A	G/G	C/C	A/A	FeMale	51	0-control	ethnic non-Han
A374	A/A	G/G	C/C	A/A	FeMale	64	0-control	ethnic Han
A375	A/A	G/G	C/C	A/A	FeMale	51	0-control	ethnic Han
A376	C/A	A/G	C/C	G/A	FeMale	47	0-control	ethnic Han
A377	C/C	A/A	C/C	G/G	FeMale	67	0-control	ethnic Han
A378	C/A	A/G	C/C	G/A	FeMale	41	0-control	ethnic non-Han
A379	C/A	A/G	C/C	G/A	FeMale	53	0-control	ethnic Han
A380	C/A	A/G	C/C	G/A	FeMale	29	0-control	ethnic Han
A381	C/A	G/G	C/C	G/A	FeMale	54	0-control	ethnic Han
A382	C/A	G/G	C/C	G/A	FeMale	52	0-control	ethnic Han
A383	C/A	A/G	C/C	G/A	FeMale	41	0-control	ethnic Han
A384	A/A	G/G	C/C	A/A	Male	68	0-control	ethnic Han
A385	C/A	A/G	C/C	G/A	Male	69	0-control	ethnic Han
A386	A/A	G/G	C/C	A/A	FeMale	52	0-control	ethnic Han
A387	C/A	A/G	C/C	G/A	Male	52	0-control	ethnic Han
A388	C/C	A/A	C/C	G/G	FeMale	63	0-control	ethnic Han
A389	A/A	G/G	C/C	A/A	FeMale	55	0-control	ethnic Han
A390	C/A	G/G	C/T	G/A	FeMale	51	0-control	ethnic Han
A391	C/C	A/G	C/T	G/G	Male	51	0-control	ethnic Han
A392	A/A	G/G	C/C	A/A	FeMale	40	0-control	ethnic Han
A393	A/A	G/G	C/C	A/A	FeMale	52	0-control	ethnic Han
A394	A/A	G/G	C/C	A/A	FeMale	54	0-control	ethnic Han
A395	C/A	A/G	C/C	G/A	FeMale	58	0-control	ethnic Han
A396	C/C	A/G	C/C	G/G	FeMale	41	0-control	ethnic Han
A397	C/A	A/G	C/C	G/A	Male	38	0-control	ethnic Han
A398	C/A	A/G	C/C	G/A	FeMale	53	0-control	ethnic Han
A399	A/A	G/G	C/C	G/A	FeMale	44	0-control	ethnic Han
A400	C/A	A/G	C/C	G/A	Male	48	0-control	ethnic Han
A401	C/A	A/G	C/C	G/A	Male	48	0-control	ethnic Han
A402	A/A	G/G	C/C	G/A	FeMale	51	0-control	ethnic non-Han
A403	C/A	A/G	C/C	G/A	Male	52	0-control	ethnic non-Han
A404	A/A	G/G	C/C	A/A	Male	47	0-control	ethnic non-Han
A405	C/A	A/G	C/C	G/A	Male	59	0-control	ethnic non-Han
A406	C/A	A/G	C/C	G/A	Male	52	0-control	ethnic Han
A407	C/C	A/A	C/C	G/G	Male	50	0-control	ethnic Han
A408	C/A	A/G	C/C	G/A	Male	48	0-control	ethnic Han
A409	C/A	A/G	C/C	G/A	Male	58	0-control	ethnic non-Han
A410	A/A	G/G	C/C	A/A	Male	61	0-control	ethnic Han
A411	C/C	A/A	C/C	G/G	Male	51	0-control	ethnic Han
A412	A/A	G/G	C/C	A/A	Male	52	0-control	ethnic Han
A413	A/A	G/G	C/C	A/A	FeMale	57	0-control	ethnic Han
A414	C/A	A/G	C/C	G/A	Male	57	0-control	ethnic Han
A415	A/A	G/G	C/C	A/A	Male	52	0-control	ethnic Han
A416	A/A	G/G	C/C	A/A	Male	64	0-control	ethnic Han
A417	C/A	G/G	C/C	G/A	FeMale	61	0-control	ethnic non-Han
A418	C/A	A/G	C/C	G/A	FeMale	61	0-control	ethnic Han
A419	A/A	G/G	C/C	A/A	FeMale	50	0-control	ethnic Han
A420	A/A	G/G	C/C	G/A	Male	62	0-control	ethnic Han
A421	C/A	A/G	C/C	G/A	FeMale	49	0-control	ethnic Han
A422	C/A	A/G	C/C	G/A	FeMale	70	0-control	ethnic Han
A423	C/A	A/G	C/C	G/A	Male	52	0-control	ethnic Han
A424	C/A	A/G	C/C	G/A	FeMale	43	0-control	ethnic Han
A425	C/A	A/G	C/C	G/A	FeMale	43	0-control	ethnic Han
A426	C/C	A/A	C/C	G/G	Male	52	0-control	ethnic Han
A427	C/A	A/G	C/C	G/A	Male	61	0-control	ethnic Han
A428	C/C	A/A	C/C	G/G	FeMale	35	0-control	ethnic Han
A429	C/A	A/G	C/C	G/A	Male	53	0-control	ethnic Han
A430	A/A	G/G	C/C	A/A	FeMale	60	0-control	ethnic Han
A431	C/A	A/G	C/C	G/A	FeMale	44	0-control	ethnic Han
A432	C/A	A/G	C/C	G/A	FeMale	62	0-control	ethnic Han
A433	C/C	A/A	C/C	G/G	FeMale	55	0-control	ethnic non-Han
A434	A/A	G/G	C/C	A/A	Male	52	0-control	ethnic non-Han
A435	C/A	A/G	C/C	G/G	FeMale	54	0-control	ethnic Han
A436	A/A	G/G	C/C	A/A	FeMale	44	0-control	ethnic Han
A437	C/A	G/G	C/T	G/A	FeMale	58	0-control	ethnic Han
A438	C/A	A/G	C/C	G/A	Male	44	0-control	ethnic Han
A439	A/A	G/G	C/C	A/A	Male	58	0-control	ethnic non-Han
A440	A/A	G/G	C/C	A/A	Male	47	0-control	ethnic non-Han
A441	C/A	A/G	C/C	G/A	Male	51	0-control	ethnic non-Han
A442	C/A	A/G	C/C	G/A	Male	45	0-control	ethnic Han
A443	C/A	A/G	C/C	G/A	Male	46	0-control	ethnic Han
A444	C/C	A/A	C/C	G/G	Male	45	0-control	ethnic non-Han
A445	C/C	A/G	C/T	G/G	Male	40	0-control	ethnic non-Han
A446	A/A	G/G	C/C	G/A	Male	57	0-control	ethnic non-Han
A447	C/C	A/G	C/C	G/G	Male	45	0-control	ethnic Han
A448	C/A	A/G	C/C	G/A	Male	64	0-control	ethnic non-Han
A449	C/A	A/G	C/C	G/A	FeMale	56	0-control	ethnic non-Han
A450	C/A	A/G	C/C	G/A	Male	22	0-control	ethnic non-Han
A451	C/A	A/G	C/C	G/G	Male	49	0-control	ethnic Han
A452	C/A	A/G	C/C	G/A	Male	47	0-control	ethnic Han
A453	A/A	G/G	C/C	A/A	FeMale	48	0-control	ethnic non-Han
A454	C/A	A/G	C/C	G/A	Male	51	0-control	ethnic non-Han
A455	A/A	G/G	C/C	A/A	Male	49	0-control	ethnic Han
A456	A/A	G/G	C/C	A/A	Male	61	0-control	ethnic Han
A457	C/A	A/G	C/C	G/A	FeMale	50	0-control	ethnic Han
A458	C/A	A/G	C/C	G/A	FeMale	34	0-control	ethnic non-Han
A459	C/A	A/G	C/C	G/A	FeMale	53	0-control	ethnic non-Han
A460	C/A	G/G	C/C	G/A	Male	51	0-control	ethnic non-Han
A461	C/A	G/G	C/C	G/A	FeMale	63	0-control	ethnic Han
A462	C/A	A/G	C/C	G/A	Male	52	0-control	ethnic Han
A463	C/A	A/G	C/C	G/A	FeMale	56	0-control	ethnic non-Han
A464	A/A	G/G	C/C	A/A	FeMale	49	0-control	ethnic non-Han
A465	A/A	G/G	C/C	A/A	FeMale	44	0-control	ethnic Han
A466	C/C	A/A	C/C	G/G	FeMale	59	0-control	ethnic Han
A467	C/A	A/G	C/C	G/A	FeMale	63	0-control	ethnic Han
A468	C/C	A/A	C/C	G/G	FeMale	48	0-control	ethnic non-Han
A469	C/A	G/G	C/T	G/G	FeMale	53	0-control	ethnic Han
A470	A/A	G/G	C/C	A/A	FeMale	53	0-control	ethnic Han
A471	C/A	A/G	C/C	G/A	FeMale	50	0-control	ethnic Han
A472	C/A	A/G	C/C	G/A	FeMale	53	0-control	ethnic non-Han
A473	C/A	A/G	C/C	G/G	FeMale	45	0-control	ethnic Han
A474	C/A	A/G	C/C	G/A	FeMale	31	0-control	ethnic Han
A475	A/A	G/G	C/C	A/A	FeMale	46	0-control	ethnic Han
A476	A/A	G/G	C/C	A/A	FeMale	32	0-control	ethnic Han
A477	C/A	G/G	C/C	G/A	FeMale	51	0-control	ethnic non-Han
A478	A/A	G/G	C/C	A/A	FeMale	55	0-control	ethnic non-Han
A479	A/A	G/G	C/C	A/A	FeMale	53	0-control	ethnic non-Han
A480	C/A	A/G	C/C	G/A	FeMale	52	0-control	ethnic Han
A481	A/A	G/G	C/C	A/A	FeMale	49	0-control	ethnic non-Han
A482	C/A	A/G	C/C	G/A	FeMale	39	0-control	ethnic Han
A483	C/A	A/G	C/C	G/A	FeMale	40	0-control	ethnic Han
A484	C/C	A/G	C/C	G/G	FeMale	41	0-control	ethnic non-Han
A485	A/A	G/G	C/C	A/A	FeMale	27	0-control	ethnic Han
A486	C/C	A/G	C/T	G/G	Male	26	0-control	ethnic Han
A487	A/A	G/G	C/C	A/A	Male	35	0-control	ethnic Han
A488	C/A	A/G	C/C	G/A	Male	39	0-control	ethnic Han
A489	C/A	A/G	C/C	G/A	FeMale	34	0-control	ethnic Han
A490	A/A	G/G	C/C	G/A	Male	44	0-control	ethnic non-Han
A491	C/C	A/G	C/C	G/G	Male	20	0-control	ethnic Han
A492	A/A	G/G	C/C	A/A	FeMale	29	0-control	ethnic non-Han
A493	A/A	G/G	C/C	A/A	FeMale	35	0-control	ethnic non-Han
A494	A/A	G/G	C/C	A/A	Male	36	0-control	ethnic non-Han
A495	C/C	A/A	C/C	G/G	FeMale	38	0-control	ethnic non-Han
A496	C/A	A/G	C/C	G/A	FeMale	39	0-control	ethnic non-Han
A497	C/A	A/G	C/C	G/A	Male	41	0-control	ethnic Han
A498	A/A	G/G	C/C	A/A	FeMale	36	0-control	ethnic Han
A499	C/C	A/A	C/C	G/G	Male	50	0-control	ethnic Han
A500	A/A	G/G	C/C	A/A	Male	29	0-control	ethnic non-Han
A501	C/A	A/G	C/C	G/A	FeMale	45	0-control	ethnic Han
A502	C/A	A/G	C/C	G/A	Male	55	0-control	ethnic Han
A503	C/A	A/G	C/C	G/A	Male	28	0-control	ethnic non-Han
A504	C/A	A/G	C/C	G/A	Male	50	0-control	ethnic non-Han
A505	C/A	A/G	C/C	G/A	FeMale	43	0-control	ethnic non-Han
A506	A/A	G/G	C/C	A/A	Male	52	0-control	ethnic Han
A507	C/C	A/G	C/T	G/G	Male	23	0-control	ethnic Han
A508	A/A	G/G	C/C	A/A	FeMale	26	0-control	ethnic non-Han
A509	C/A	A/G	C/C	G/A	Male	37	0-control	ethnic Han
A510	A/A	G/G	C/C	A/A	FeMale	24	0-control	ethnic Han
A511	C/A	A/G	C/C	G/A	Male	27	0-control	ethnic Han
A512	C/A	A/G	C/C	G/A	FeMale	50	0-control	ethnic Han
A513	C/A	G/G	C/C	G/A	Male	26	0-control	ethnic Han
A514	C/C	A/A	C/C	G/G	Male	28	0-control	ethnic Han
A515	A/A	G/G	C/C	G/A	FeMale	33	0-control	ethnic Han
A516	C/A	A/G	C/C	G/A	FeMale	37	0-control	ethnic Han
A517	C/A	A/G	C/C	G/A	Male	28	0-control	ethnic Han
A518	C/C	A/A	C/C	G/G	Male	27	0-control	ethnic Han
A519	C/A	A/G	C/C	G/A	Male	26	0-control	ethnic Han
A520	A/A	G/G	C/C	A/A	FeMale	33	0-control	ethnic Han
A521	C/C	A/G	C/T	G/G	Male	30	0-control	ethnic non-Han
A522	C/A	A/G	C/C	G/A	FeMale	59	0-control	ethnic Han
A523	C/A	G/G	C/T	G/G	FeMale	35	0-control	ethnic non-Han
A524	A/A	G/G	C/C	A/A	FeMale	32	0-control	ethnic Han
A525	C/A	A/G	C/C	G/A	FeMale	29	0-control	ethnic Han
A526	C/A	G/G	C/C	G/A	Male	29	0-control	ethnic Han
A527	A/A	G/G	C/C	G/A	FeMale	38	0-control	ethnic Han
A528	C/A	A/G	C/C	G/A	Male	32	0-control	ethnic Han
A529	C/A	A/G	C/C	G/A	Male	51	0-control	ethnic Han
A530	C/A	A/G	C/C	G/A	Male	38	0-control	ethnic Han
A531	C/A	A/G	C/C	G/A	Male	39	0-control	ethnic Han
A532	A/A	G/G	C/C	A/A	FeMale	41	0-control	ethnic Han
A533	C/A	A/G	C/C	G/A	FeMale	38	0-control	ethnic Han
A534	A/A	G/G	C/C	A/A	Male	45	0-control	ethnic Han
A535	A/A	G/G	C/C	A/A	FeMale	46	0-control	ethnic Han
A536	C/C	A/G	C/C	G/G	FeMale	42	0-control	ethnic non-Han
A537	A/A	G/G	C/C	A/A	Male	53	0-control	ethnic Han
A538	A/A	G/G	C/C	A/A	Male	57	0-control	ethnic Han
A539	C/A	A/G	C/C	G/A	FeMale	38	0-control	ethnic Han
A540	C/A	G/G	C/C	G/A	FeMale	40	0-control	ethnic Han
A541	C/A	G/G	C/T	G/A	FeMale	43	0-control	ethnic Han
A542	A/A	G/G	C/C	A/A	FeMale	59	0-control	ethnic Han
A543	A/A	G/G	C/C	A/A	FeMale	48	0-control	ethnic Han
A544	C/A	G/G	C/C	G/A	Male	37	0-control	ethnic Han
A545	A/A	G/G	C/C	A/A	FeMale	20	0-control	ethnic non-Han
A546	C/C	A/A	C/C	G/G	Male	25	0-control	ethnic Han
A547	A/A	G/G	C/C	A/A	Male	36	0-control	ethnic non-Han
A548	C/A	G/G	C/C	G/A	FeMale	31	0-control	ethnic non-Han
A549	A/A	G/G	C/C	A/A	Male	31	0-control	ethnic Han
A550	C/C	A/A	C/C	G/G	Male	30	0-control	ethnic Han
A551	C/C	A/A	C/C	G/G	FeMale	30	0-control	ethnic Han
A552	C/C	A/A	C/C	G/G	FeMale	32	0-control	ethnic Han
A553	C/A	A/G	C/C	G/A	Male	38	0-control	ethnic Han
A554	C/A	G/G	C/C	G/A	Male	32	0-control	ethnic non-Han
A555	A/A	G/G	C/C	A/A	FeMale	18	0-control	ethnic Han
A556	C/C	A/A	C/C	G/G	Male	25	0-control	ethnic Han
A557	A/A	G/G	C/C	A/A	Male	54	0-control	ethnic Han
A558	A/A	G/G	C/C	A/A	FeMale	37	0-control	ethnic Han
A559	A/A	G/G	C/C	A/A	FeMale	25	0-control	ethnic Han
A560	C/C	A/G	C/C	G/G	FeMale	27	0-control	ethnic Han
A561	C/A	A/G	C/C	G/A	FeMale	29	0-control	ethnic Han
A562	C/C	A/A	C/C	G/G	FeMale	42	0-control	ethnic Han
